# Supplementary material for: Comparative Transcriptome Analysis Unravels Defense Pathways of Fraxinus velutina Torr Against Salt Stress
Source: Front Plant Sci. 2022 Mar 4;13:842726. doi: 10.3389/fpls.2022.842726 (PMC8931533; doi:10.3389/fpls.2022.842726)
Supplement: Supplementary file 11 [file Table_7.XLSX]

## Sheet: R7SR vs. R7CR
Table S7 KEGG pathway enrichment analysis of DEGs from comparisons R7SR vs. R7CR and S4SR vs. S4CR
ID	Description	GeneRatio	BgRatio	pvalue	p.adjust	qvalue	geneID	Count
ath01240	Biosynthesis of cofactors	92	250	3.37e-07	1.69e-05	1.45e-05	AT3G63410/AT5G63570/AT5G28840/AT4G30440/AT3G24030/AT5G63400/AT5G08415/AT1G32440/AT3G16050/AT1G23360/AT5G60540/AT2G17630/AT4G27270/AT3G23820/AT3G18680/AT1G21640/AT5G59750/AT1G50170/AT2G46110/AT4G37930/AT4G01690/AT1G44170/AT1G04640/AT4G00110/AT5G46290/AT4G36940/AT1G18870/AT1G64970/AT1G17710/AT5G55120/AT1G12350/AT5G23300/AT3G12670/AT5G56090/AT1G58290/AT4G25280/AT1G74960/AT4G26850/AT3G48000/AT2G18250…	92
ath01200	Carbon metabolism	98	272	4.38e-07	1.69e-05	1.45e-05	AT2G05710/AT1G68010/AT5G24400/AT1G13700/AT3G14420/AT5G14590/AT1G32440/AT1G09420/AT3G04120/AT3G55800/AT2G17630/AT5G61410/AT2G36530/AT5G11520/AT2G43750/AT1G11860/AT4G37930/AT1G79550/AT4G26530/AT5G14780/AT2G36460/AT5G44520/AT3G61440/AT4G35090/AT3G50520/AT1G13440/AT3G13110/AT5G13420/AT2G45290/AT3G52930/AT5G58330/AT2G42600/AT5G56350/AT2G22780/AT4G00570/AT2G13360/AT5G38430/AT5G43330/AT4G38970/AT1G18640…	98
ath01230	Biosynthesis of amino acids	86	244	6.4e-06	0.000185617	0.00015833	AT2G05710/AT5G14590/AT1G32440/AT3G04120/AT4G33680/AT1G80560/AT2G17630/AT5G61410/AT2G36530/AT5G38530/AT5G11520/AT2G43750/AT4G37930/AT1G79550/AT3G02020/AT4G26530/AT2G36460/AT5G44520/AT2G37500/AT3G61440/AT3G50520/AT1G13440/AT5G17920/AT3G13110/AT5G13420/AT2G45290/AT4G27070/AT3G52930/AT3G06350/AT5G56350/AT4G29840/AT4G38970/AT1G18640/AT1G08630/AT4G02610/AT2G22910/AT1G16300/AT5G34930/AT3G12780/AT1G08250…	86
ath00906	Carotenoid biosynthesis	15	29	0.000700671	0.0111865	0.00954204	AT2G27150/AT5G17230/AT1G52340/AT3G19270/AT1G10830/AT3G53130/AT5G67030/AT1G08550/AT2G29090/AT3G04870/AT4G25700/AT4G14210/AT5G57030/AT3G10230/AT1G30100	15
ath00860	Porphyrin and chlorophyll metabolism	23	53	0.000771484	0.0111865	0.00954204	AT5G63570/AT1G74470/AT1G50170/AT4G01690/AT3G09150/AT1G44000/AT5G56090/AT1G58290/AT4G03240/AT3G14930/AT5G08280/AT5G54190/AT5G26030/AT5G18660/AT4G18480/AT5G43860/AT5G40850/AT5G45930/AT4G25080/AT3G56940/AT5G13630/AT4G22920/AT1G44446	23
ath00260	Glycine, serine and threonine metabolism	28	70	0.00105006	0.0135341	0.0115445	AT1G68010/AT2G17630/AT5G38530/AT1G11860/AT4G37930/AT3G02020/AT2G24580/AT3G50520/AT4G27070/AT2G13360/AT4G29840/AT1G18640/AT1G08630/AT4G02610/AT4G29890/AT4G33010/AT4G34200/AT4G11640/AT1G22170/AT3G08590/AT1G12550/AT1G70580/AT1G09780/AT4G12290/AT4G39660/AT3G08860/AT1G80380/AT1G32470	28
ath00010	Glycolysis / Gluconeogenesis	42	119	0.00147358	0.0170936	0.0145807	AT1G77120/AT1G32440/AT3G04120/AT2G36530/AT1G44170/AT1G79550/AT4G33070/AT4G26530/AT2G36460/AT4G17260/AT3G50520/AT1G13440/AT3G52930/AT3G48000/AT5G56350/AT4G38970/AT1G16300/AT5G43940/AT4G37870/AT3G12780/AT1G20950/AT1G56190/AT1G22170/AT3G52990/AT3G08590/AT3G49160/AT3G61610/AT3G54050/AT4G29130/AT3G22960/AT3G16910/AT1G09780/AT4G36250/AT1G59900/AT1G23800/AT2G19860/AT1G43670/AT5G24760/AT2G01140/AT5G08570…	42
ath00770	Pantothenate and CoA biosynthesis	16	34	0.00173034	0.0182472	0.0155648	AT1G65840/AT2G46110/AT1G44170/AT1G12350/AT3G48000/AT2G18250/AT3G11470/AT3G48560/AT2G31810/AT5G12200/AT5G65780/AT3G49680/AT4G36250/AT1G23800/AT2G43020/AT3G18030	16
ath00514	Other types of O-glycan biosynthesis	8	13	0.00324151	0.0313346	0.0267282	AT2G35610/AT3G04240/AT5G25265/AT3G01720/AT1G75110/AT5G13500/AT3G11540/AT5G50420	8
ath00230	Purine metabolism	35	101	0.00496568	0.0443091	0.0377955	AT5G63400/AT3G21110/AT1G32440/AT2G21790/AT2G14750/AT2G26230/AT1G19920/AT5G11160/AT3G03900/AT5G03300/AT1G31220/AT2G02970/AT4G04955/AT3G22890/AT4G13720/AT5G56350/AT4G22570/AT5G35170/AT4G04880/AT3G06200/AT5G47840/AT4G09320/AT3G52990/AT3G17470/AT3G49160/AT4G02260/AT2G37250/AT3G57550/AT2G38280/AT3G22960/AT4G24730/AT2G42070/AT2G37690/AT1G09830/AT5G08570	35
ath00630	Glyoxylate and dicarboxylate metabolism	28	78	0.00661836	0.0548379	0.0467764	AT2G05710/AT1G68010/AT3G14420/AT1G11860/AT4G37930/AT5G14780/AT4G35090/AT2G22780/AT2G13360/AT5G38430/AT5G43330/AT5G04140/AT1G04410/AT4G33010/AT4G17360/AT5G37600/AT4G18360/AT1G53240/AT1G12550/AT5G47435/AT5G35630/AT1G67090/AT1G70580/AT3G16910/AT3G58750/AT3G25530/AT1G80380/AT1G32470	28
ath00730	Thiamine metabolism	10	21	0.0114722	0.088718	0.075676	AT3G24030/AT5G63400/AT5G54770/AT5G35170/AT5G47840/AT4G15560/AT2G37250/AT5G65720/AT1G02880/AT2G29630	10
ath00030	Pentose phosphate pathway	21	58	0.0156821	0.113695	0.0969811	AT5G24400/AT1G13700/AT1G09420/AT5G61410/AT4G26530/AT2G36460/AT5G44520/AT5G13420/AT2G45290/AT3G52930/AT4G38970/AT1G17160/AT1G20950/AT2G01290/AT3G54050/AT3G04790/AT3G60750/AT1G43670/AT5G40760/AT2G01140/AT1G12230	21
ath00130	Ubiquinone and other terpenoid-quinone biosynthesis	15	39	0.0217657	0.148519	0.126686	AT3G63410/AT3G21240/AT1G23360/AT4G27270/AT1G18870/AT1G64970/AT4G05160/AT5G08740/AT5G63380/AT1G60550/AT1G68890/AT2G30490/AT1G30520/AT4G36750/AT5G58800	15
ath00500	Starch and sucrose metabolism	43	171	0.0266571	0.17179	0.146536	AT5G48300/AT2G39930/AT4G22590/AT1G04920/AT1G23870/AT5G45300/AT3G47000/AT3G43190/AT1G27680/AT3G13560/AT1G78580/AT5G20950/AT3G13790/AT2G01630/AT3G18080/AT5G24300/AT4G17090/AT1G66250/AT2G40840/AT5G03650/AT5G04885/AT4G02280/AT5G65140/AT4G15210/AT1G64390/AT5G49720/AT1G76130/AT1G03310/AT1G12240/AT2G44450/AT4G39210/AT3G29320/AT5G51460/AT5G11720/AT5G20280/AT4G29130/AT2G36190/AT2G18700/AT5G19220/AT2G19860…	43
ath00250	Alanine, aspartate and glutamate metabolism	18	51	0.0314926	0.192271	0.164006	AT5G17330/AT5G11520/AT2G13360/AT1G29900/AT1G72330/AT5G12040/AT5G37600/AT5G10240/AT3G16150/AT5G35630/AT1G70580/AT5G53460/AT3G20330/AT5G18170/AT4G39660/AT5G10920/AT3G08860/AT3G47340	18
ath00750	Vitamin B6 metabolism	7	15	0.0375645	0.217874	0.185845	AT3G16050/AT5G60540/AT2G17630/AT1G17710/AT4G29840/AT5G49970/AT5G01410	7
ath00941	Flavonoid biosynthesis	10	25	0.0432252	0.238768	0.203668	AT5G13930/AT2G40890/AT3G51240/AT5G08640/AT4G34050/AT2G19070/AT5G48930/AT2G30490/AT5G07990/AT4G22880	10
ath00052	Galactose metabolism	19	57	0.048932	0.258005	0.220077	AT3G13790/AT3G57520/AT1G60470/AT1G56600/AT3G54440/AT1G72990/AT4G01970/AT2G47180/AT1G12240/AT5G20250/AT3G56310/AT5G11720/AT4G29130/AT5G40390/AT2G36190/AT4G10960/AT2G19860/AT1G55740/AT5G15140	19
ath00240	Pyrimidine metabolism	20	61	0.0518983	0.261748	0.22327	AT3G18680/AT2G21790/AT1G50510/AT2G02970/AT5G23300/AT3G12670/AT4G25280/AT3G25400/AT1G30820/AT1G29900/AT5G23070/AT3G46940/AT3G07800/AT2G16370/AT4G22930/AT4G09320/AT5G12200/AT1G55810/AT3G20330/AT2G36310	20
ath00071	Fatty acid degradation	16	47	0.0564345	0.272767	0.232669	AT1G77120/AT1G69500/AT1G44170/AT3G48000/AT5G43940/AT3G06860/AT4G23850/AT5G27600/AT4G14440/AT1G49430/AT5G58860/AT1G65520/AT4G36250/AT1G23800/AT5G24760/AT5G65110	16
ath00670	One carbon pool by folate	8	21	0.0881452	0.408994	0.34887	AT1G11860/AT4G37930/AT1G31220/AT2G44160/AT2G16370/AT4G17360/AT5G47435/AT1G76730	8
ath02010	ABC transporters	11	32	0.0974543	0.420924	0.359046	AT3G28345/AT1G27940/AT2G07680/AT5G06530/AT4G25450/AT1G31770/AT3G28860/AT1G71960/AT2G41700/AT4G25960/AT2G47000	11
ath00061	Fatty acid biosynthesis	14	43	0.0987633	0.420924	0.359046	AT3G16170/AT3G02630/AT5G46290/AT1G74960/AT2G05990/AT4G23850/AT5G16390/AT1G36160/AT5G27600/AT1G49430/AT4G13180/AT1G24360/AT2G43710/AT2G38040	14
ath00270	Cysteine and methionine metabolism	34	120	0.101602	0.420924	0.359046	AT2G17630/AT1G64660/AT5G11520/AT5G43850/AT2G43750/AT3G02020/AT3G61440/AT4G17260/AT5G17920/AT3G13110/AT1G69770/AT3G61510/AT2G22780/AT5G43330/AT5G49160/AT4G23100/AT1G04410/AT2G36880/AT4G14880/AT4G34200/AT5G27380/AT1G53240/AT5G56760/AT1G55920/AT5G65780/AT3G49680/AT4G39660/AT3G08860/AT3G25900/AT2G19590/AT5G26600/AT3G63250/AT1G70310/AT1G05010	34
ath00562	Inositol phosphate metabolism	23	79	0.124978	0.499914	0.426424	AT4G18010/AT5G16760/AT1G49340/AT3G14270/AT2G22240/AT3G08510/AT1G21980/AT3G19420/AT1G31190/AT5G20840/AT2G14170/AT1G60890/AT4G38570/AT2G26870/AT3G09920/AT1G22100/AT3G14205/AT5G58730/AT1G14520/AT4G39120/AT2G19800/AT2G40116/AT4G33240	23
ath00920	Sulfur metabolism	13	42	0.149731	0.545826	0.465586	AT2G14750/AT2G43750/AT1G19920/AT3G03900/AT3G61440/AT3G13110/AT3G22890/AT4G21990/AT5G04590/AT4G14880/AT5G56760/AT1G55920/AT1G53580	13
ath00510	N-Glycan biosynthesis	14	46	0.153795	0.545826	0.465586	AT1G67490/AT1G12990/AT3G27540/AT4G21150/AT2G05320/AT4G16710/AT1G16570/AT2G39630/AT1G51590/AT4G18230/AT1G32210/AT1G48140/AT5G66680/AT2G16530	14
ath00310	Lysine degradation	10	31	0.156319	0.545826	0.465586	AT4G15180/AT1G44170/AT2G24580/AT3G48000/AT2G23380/AT2G17900/AT5G13960/AT4G36250/AT1G23800/AT5G55070	10
ath00650	Butanoate metabolism	7	20	0.156497	0.545826	0.465586	AT5G17330/AT2G26800/AT3G56840/AT3G48560/AT2G31810/AT3G16910/AT3G25530	7
ath00330	Arginine and proline metabolism	17	54	0.159983	0.545826	0.465586	AT3G28480/AT1G65840/AT5G11520/AT1G44170/AT5G66060/AT4G34880/AT5G18900/AT3G48000/AT2G43080/AT1G20270/AT2G27450/AT4G36250/AT1G23800/AT2G43020/AT3G47450/AT1G70310/AT3G55610	16
ath00410	beta-Alanine metabolism	14	47	0.175144	0.574164	0.489759	AT5G17330/AT1G65840/AT1G44170/AT3G48000/AT4G04320/AT2G14170/AT5G12200/AT1G06550/AT4G36250/AT4G12290/AT1G23800/AT2G43020/AT4G31810/AT5G65110	14
ath00531	Glycosaminoglycan degradation	4	10	0.180141	0.574164	0.489759	AT5G07830/AT1G72990/AT5G34940/AT5G27730	4
ath00051	Fructose and mannose metabolism	18	63	0.183138	0.574164	0.489759	AT5G51970/AT4G26530/AT2G36460/AT5G01930/AT3G52930/AT2G20680/AT1G67070/AT2G39770/AT4G38970/AT1G20950/AT1G07110/AT1G17890/AT3G54050/AT4G29130/AT2G19860/AT1G43670/AT2G01140/AT5G57655	18
ath00062	Fatty acid elongation	11	36	0.188226	0.574584	0.490117	AT3G60340/AT1G68530/AT1G19440/AT2G28630/AT1G04220/AT5G04530/AT1G01120/AT2G26640/AT2G26250/AT5G10480/AT1G01710	11
ath00450	Selenocompound metabolism	6	18	0.217803	0.631629	0.538776	AT2G17420/AT1G64660/AT1G19920/AT5G17920/AT3G22890/AT3G55400	6
ath00760	Nicotinate and nicotinamide metabolism	6	18	0.217803	0.631629	0.538776	AT1G21640/AT4G36940/AT5G09230/AT1G78590/AT2G36310/AT5G20070	6
ath01212	Fatty acid metabolism	19	70	0.244944	0.693011	0.591135	AT3G60340/AT3G16170/AT3G02630/AT5G46290/AT1G74960/AT2G05990/AT3G06860/AT4G23850/AT5G16390/AT1G36160/AT5G27600/AT1G49430/AT4G13180/AT5G10480/AT1G24360/AT3G12120/AT2G43710/AT2G38040/AT5G65110	19
ath00340	Histidine metabolism	6	19	0.260437	0.719302	0.613561	AT1G44170/AT3G48000/AT4G36250/AT1G23800/AT4G39120/AT1G31860	6
ath00620	Pyruvate metabolism	31	97	0.280279	0.743496	0.634198	AT1G77120/AT1G32440/AT1G44170/AT4G17260/AT3G02720/AT5G58330/AT2G42600/AT3G48000/AT5G56350/AT2G22780/AT4G00570/AT5G43330/AT5G43940/AT4G37870/AT5G16390/AT1G04410/AT1G36160/AT3G52990/AT1G53240/AT3G49160/AT1G79750/AT3G22960/AT3G16910/AT4G36250/AT1G59900/AT1G23800/AT1G67280/AT2G38040/AT5G24760/AT3G14940/AT5G08570	31
ath00400	Phenylalanine, tyrosine and tryptophan biosynthesis	15	56	0.298244	0.743496	0.634198	AT5G38530/AT5G11520/AT4G27070/AT3G06350/AT4G02610/AT5G34930/AT1G08250/AT3G29200/AT2G21940/AT5G66120/AT4G39980/AT5G17990/AT5G10870/AT3G07630/AT5G48220	15
ath00280	Valine, leucine and isoleucine degradation	14	52	0.300294	0.743496	0.634198	AT3G16170/AT1G44170/AT2G26800/AT3G48000/AT2G14170/AT5G65780/AT3G49680/AT1G06550/AT4G36250/AT1G23800/AT4G39660/AT3G08860/AT4G31810/AT4G16800	14
ath00780	Biotin metabolism	5	16	0.30043	0.743496	0.634198	AT5G46290/AT1G74960/AT2G05990/AT4G13180/AT1G24360	5
ath00220	Arginine biosynthesis	10	36	0.306826	0.743496	0.634198	AT5G11520/AT2G37500/AT2G22910/AT1G72330/AT5G37600/AT5G35630/AT1G70580/AT5G18170/AT3G47450/AT5G10920	10
ath00513	Various types of N-glycan biosynthesis	9	32	0.307653	0.743496	0.634198	AT1G26810/AT4G21150/AT2G05320/AT4G16710/AT1G16570/AT1G51590/AT4G18230/AT1G32210/AT5G66680	9
ath00561	Glycerolipid metabolism	17	66	0.344002	0.811393	0.692114	AT2G38110/AT1G44170/AT3G02600/AT2G19450/AT5G20410/AT5G13640/AT4G25840/AT3G48000/AT1G11090/AT3G11670/AT2G20900/AT3G56310/AT4G36250/AT4G31780/AT1G23800/AT1G75020/AT1G80380	17
ath04122	Sulfur relay system	4	13	0.350306	0.811393	0.692114	AT1G01290/AT5G65720/AT2G31955/AT3G61113	4
ath01250	Biosynthesis of nucleotide sugars	25	100	0.356733	0.811393	0.692114	AT5G48300/AT5G28840/AT4G30440/AT3G23820/AT1G27680/AT4G00110/AT1G30620/AT1G67070/AT2G39770/AT3G08900/AT3G53520/AT3G02230/AT3G54690/AT5G15770/AT4G39210/AT1G17890/AT1G08200/AT4G29130/AT1G14520/AT5G19220/AT4G10960/AT2G19860/AT1G78570/AT2G19800/AT1G31070	25
ath00053	Ascorbate and aldarate metabolism	16	63	0.374647	0.835751	0.712891	AT5G28840/AT4G30440/AT3G23820/AT1G44170/AT4G00110/AT5G55120/AT1G07890/AT4G26850/AT3G48000/AT3G47930/AT5G03630/AT1G14520/AT4G36250/AT1G23800/AT4G39120/AT2G19800	16
ath00790	Folate biosynthesis	8	30	0.385509	0.843755	0.719718	AT5G59750/AT2G16370/AT5G41480/AT2G28880/AT1G01290/AT1G16540/AT2G31955/AT5G64300	8
ath04626	Plant-pathogen interaction	49	204	0.395117	0.848771	0.723997	AT4G35310/AT2G24610/AT2G41410/AT4G20360/AT2G38470/AT4G09570/AT2G14580/AT5G52640/AT1G68530/AT1G19440/AT1G76650/AT5G42380/AT2G28260/AT2G28630/AT1G04220/AT5G21274/AT3G50770/AT3G25600/AT5G19450/AT2G43290/AT3G51850/AT5G04530/AT4G20780/AT4G01370/AT1G18210/AT1G74740/AT1G01120/AT2G04030/AT1G66400/AT2G26640/AT3G43810/AT5G53130/AT2G26250/AT4G14440/AT4G08500/AT1G18530/AT4G24190/AT1G76640/AT3G07490/AT3G47450…	49
ath00910	Nitrogen metabolism	11	43	0.403038	0.850044	0.725083	AT3G01500/AT5G60770/AT2G28210/AT4G33580/AT5G04140/AT5G14570/AT5G37600/AT5G35630/AT5G53460/AT5G18170/AT1G12940	11
ath04146	Peroxisome	21	87	0.445105	0.907698	0.774261	AT2G39970/AT3G14420/AT5G14590/AT1G79810/AT2G26800/AT2G24580/AT4G35090/AT4G04320/AT2G13360/AT2G14860/AT3G04460/AT4G23850/AT1G48635/AT5G27600/AT4G18360/AT1G49430/AT1G08830/AT5G23310/AT5G65110/AT1G65930/AT5G20070	21
ath00511	Other glycan degradation	5	19	0.453849	0.907698	0.774261	AT5G66150/AT3G54440/AT1G72990/AT2G28100/AT5G05460	5
ath00740	Riboflavin metabolism	5	19	0.453849	0.907698	0.774261	AT5G59750/AT4G11570/AT1G79790/AT2G42070/AT5G64300	5
ath00300	Lysine biosynthesis	4	15	0.46676	0.909883	0.776126	AT4G33680/AT3G02020/AT5G11880/AT2G13810	4
ath03015	mRNA surveillance pathway	28	119	0.485594	0.909883	0.776126	AT3G58500/AT5G25510/AT5G28900/AT5G47010/AT4G34110/AT1G51690/AT3G05580/AT5G59160/AT1G17720/AT1G02140/AT5G60940/AT2G39260/AT5G51120/AT3G07810/AT2G39840/AT1G17980/AT1G49760/AT5G65260/AT1G13460/AT3G52210/AT1G15200/AT1G10430/AT5G01400/AT1G33980/AT1G58470/AT1G11400/AT5G58470/AT3G09880	28
ath00480	Glutathione metabolism	24	103	0.513978	0.909883	0.776126	AT1G17180/AT5G14590/AT1G09420/AT2G31570/AT2G21790/AT2G47730/AT5G26220/AT1G10370/AT3G09270/AT1G07890/AT1G78380/AT3G54660/AT4G23100/AT1G78320/AT3G55040/AT5G27380/AT1G63770/AT1G65820/AT4G30920/AT4G31870/AT4G29210/AT5G40760/AT1G65930/AT1G70310	24
ath00600	Sphingolipid metabolism	7	29	0.51616	0.909883	0.776126	AT1G27980/AT3G54440/AT1G14290/AT1G72990/AT5G51290/AT4G22330/AT3G56310	7
ath01040	Biosynthesis of unsaturated fatty acids	6	25	0.532184	0.909883	0.776126	AT3G02630/AT5G10480/AT1G01710/AT3G12120/AT2G43710/AT5G65110	6
ath04130	SNARE interactions in vesicular transport	11	47	0.533471	0.909883	0.776126	AT3G55600/AT2G36900/AT3G24315/AT3G03800/AT1G28490/AT1G08560/AT2G18260/AT3G58170/AT3G09740/AT2G45200/AT3G11820	11
ath04016	MAPK signaling pathway - plant	32	139	0.536282	0.909883	0.776126	AT2G40330/AT2G38310/AT2G38470/AT3G20770/AT2G14580/AT5G53160/AT3G11410/AT2G26070/AT3G04580/AT4G35090/AT4G33520/AT1G73500/AT1G72770/AT5G21274/AT2G25490/AT4G08480/AT2G18170/AT3G61510/AT3G23240/AT1G63440/AT4G01370/AT1G07430/AT5G05440/AT1G17550/AT4G17870/AT1G32640/AT4G09320/AT3G43810/AT1G01360/AT4G08500/AT1G10210/AT3G45640	32
ath03410	Base excision repair	10	43	0.546299	0.909883	0.776126	AT1G50840/AT5G26680/AT1G13635/AT5G44680/AT1G07370/AT2G42120/AT1G08130/AT2G29570/AT3G51880/AT2G31320	10
ath00290	Valine, leucine and isoleucine biosynthesis	5	21	0.55121	0.909883	0.776126	AT1G80560/AT3G48560/AT2G31810/AT5G65780/AT3G49680	5
ath01210	2-Oxocarboxylic acid metabolism	17	74	0.551492	0.909883	0.776126	AT2G05710/AT5G14590/AT1G80560/AT5G11520/AT3G02020/AT2G37500/AT2G22910/AT1G72330/AT1G24100/AT3G48560/AT2G31810/AT4G35650/AT5G65780/AT3G49680/AT1G70580/AT3G58750/AT1G65930	17
ath04145	Phagosome	19	83	0.556435	0.909883	0.776126	AT5G19780/AT1G09210/AT3G14270/AT5G12250/AT5G45970/AT1G08450/AT5G62700/AT1G50010/AT2G18710/AT4G39080/AT2G28520/AT2G21880/AT5G60460/AT4G35020/AT3G48040/AT1G78900/AT1G75780/AT2G29550/AT4G33240	19
ath00900	Terpenoid backbone biosynthesis	14	61	0.557085	0.909883	0.776126	AT1G74470/AT2G17570/AT5G16440/AT5G58770/AT4G36810/AT1G78510/AT1G76490/AT5G60600/AT4G34350/AT2G02500/AT4G15560/AT2G36305/AT1G17050/AT4G33360	14
ath04712	Circadian rhythm - plant	9	39	0.560456	0.909883	0.776126	AT2G18790/AT5G13930/AT1G09570/AT1G09530/AT4G08920/AT4G17640/AT2G32950/AT1G22770/AT5G02810	9
ath03030	DNA replication	11	48	0.564755	0.909883	0.776126	AT1G50840/AT5G26680/AT3G18580/AT2G16440/AT1G07370/AT2G42120/AT1G08130/AT2G29570/AT5G41880/AT4G02060/AT1G44900	11
ath00020	Citrate cycle (TCA cycle)	14	63	0.610868	0.948189	0.8088	AT2G05710/AT5G14590/AT2G22780/AT5G43330/AT4G37870/AT1G04410/AT1G60810/AT5G40650/AT1G53240/AT4G35650/AT3G58750/AT1G59900/AT5G55070/AT1G65930	14
ath00100	Steroid biosynthesis	8	36	0.61129	0.948189	0.8088	AT1G58440/AT4G34640/AT3G52940/AT2G34500/AT2G07050/AT4G37760/AT1G20050/AT5G50375	8
ath04070	Phosphatidylinositol signaling system	17	77	0.624533	0.948189	0.8088	AT5G16760/AT1G49340/AT3G14270/AT3G08510/AT1G21980/AT3G19420/AT5G21274/AT1G31190/AT1G60890/AT4G38570/AT3G43810/AT3G09920/AT1G22100/AT2G20900/AT4G39120/AT2G40116/AT4G33240	17
ath00640	Propanoate metabolism	9	41	0.626514	0.948189	0.8088	AT4G17260/AT4G04320/AT2G14170/AT5G16390/AT1G36160/AT1G06550/AT2G38040/AT4G31810/AT5G65110	9
ath03018	RNA degradation	25	113	0.629401	0.948189	0.8088	AT1G31500/AT3G13470/AT2G36530/AT4G34110/AT3G14080/AT3G60500/AT3G03710/AT3G46210/AT5G27720/AT1G49760/AT2G32070/AT3G13860/AT3G44260/AT2G17510/AT5G18230/AT1G59760/AT3G13300/AT5G25080/AT1G02080/AT1G55870/AT1G60080/AT5G22250/AT1G76630/AT2G29560/AT1G26230	25
ath04144	Endocytosis	35	158	0.637608	0.948238	0.808842	AT3G20290/AT5G45750/AT5G49910/AT5G02500/AT2G31680/AT1G60430/AT5G60860/AT5G13300/AT1G10630/AT3G60860/AT4G18800/AT4G29160/AT1G21980/AT5G47520/AT3G17660/AT3G11130/AT1G16030/AT3G15730/AT1G60890/AT5G46630/AT1G13180/AT1G30825/AT3G08530/AT3G09920/AT2G42010/AT3G62290/AT1G01200/AT2G21880/AT1G71790/AT3G12580/AT4G21160/AT5G22950/AT3G27000/AT2G33385/AT3G46540	35
ath00261	Monobactam biosynthesis	3	14	0.659166	0.956235	0.815663	AT3G02020/AT1G19920/AT3G22890	3
ath00360	Phenylalanine metabolism	7	33	0.665243	0.956235	0.815663	AT5G11520/AT4G34880/AT2G20340/AT5G57170/AT2G37040/AT3G53260/AT4G12290	7
ath00520	Amino sugar and nucleotide sugar metabolism	29	133	0.667716	0.956235	0.815663	AT5G48300/AT5G28840/AT4G30440/AT3G23820/AT1G27680/AT4G00110/AT1G30620/AT1G67070/AT2G39770/AT3G08900/AT3G53520/AT3G02230/AT1G02730/AT5G24090/AT5G15770/AT4G39210/AT1G17890/AT2G38650/AT3G54420/AT1G08200/AT4G29130/AT3G19620/AT5G19220/AT4G10960/AT3G25140/AT2G19860/AT1G78570/AT1G31070/AT1G18580	29
ath00592	alpha-Linolenic acid metabolism	9	43	0.686907	0.969664	0.827118	AT1G77120/AT3G06860/AT3G45140/AT1G67560/AT3G01420/AT1G13280/AT1G19640/AT1G76690/AT5G65110	9
ath00564	Glycerophospholipid metabolism	21	99	0.706314	0.969664	0.827118	AT2G26830/AT2G32260/AT1G74210/AT2G38110/AT1G13560/AT3G02600/AT3G02040/AT3G15730/AT3G18000/AT4G38570/AT2G26870/AT1G43710/AT1G15110/AT1G74320/AT2G42010/AT4G09760/AT2G20900/AT5G20060/AT4G24730/AT2G40690/AT1G75020	21
ath00940	Phenylpropanoid biosynthesis	38	176	0.707499	0.969664	0.827118	AT5G05340/AT3G21240/AT1G05260/AT3G47000/AT5G54160/AT2G40890/AT3G62860/AT4G21960/AT5G20950/AT4G34050/AT2G41480/AT3G18080/AT4G39330/AT3G28200/AT4G05160/AT1G14550/AT3G13610/AT2G37130/AT3G19450/AT5G63380/AT5G04885/AT1G15950/AT5G42180/AT2G19070/AT4G25980/AT5G48930/AT2G30490/AT2G44450/AT2G37040/AT4G37980/AT3G53260/AT4G33420/AT5G06720/AT1G71695/AT3G24503/AT5G14130/AT5G54570/AT2G22420	38
ath00590	Arachidonic acid metabolism	4	20	0.71053	0.969664	0.827118	AT2G31570/AT5G13520/AT4G31870/AT4G29210	4
ath03060	Protein export	11	54	0.730135	0.984833	0.840058	AT1G79940/AT2G45770/AT5G42020/AT2G18710/AT2G28800/AT1G52600/AT4G40042/AT1G53530/AT1G67680/AT5G03940/AT5G60460	11
ath00380	Tryptophan metabolism	13	64	0.744211	0.992281	0.84641	AT5G54160/AT1G44170/AT4G34880/AT4G35090/AT3G48000/AT1G48910/AT2G20340/AT4G24670/AT1G24100/AT4G36250/AT1G23800/AT5G55070/AT5G25620	13
ath00350	Tyrosine metabolism	8	41	0.760715	0.997295	0.850687	AT1G77120/AT5G11520/AT5G43940/AT2G20340/AT5G57170/AT1G12050/AT4G12290/AT5G24760	8
ath00908	Zeatin biosynthesis	6	32	0.78051	0.997295	0.850687	AT1G22400/AT2G36780/AT1G22380/AT2G36750/AT5G19040/AT1G75450	6
ath00073	Cutin, suberine and wax biosynthesis	7	37	0.782361	0.997295	0.850687	AT1G69500/AT1G02205/AT1G70670/AT1G72970/AT5G04660/AT5G58860/AT4G00360	7
ath03430	Mismatch repair	7	37	0.782361	0.997295	0.850687	AT1G65070/AT3G18580/AT4G02460/AT1G07370/AT2G42120/AT1G08130/AT2G29570	7
ath00909	Sesquiterpenoid and triterpenoid biosynthesis	4	23	0.811642	0.999943	0.852946	AT1G58440/AT4G34640/AT4G37760/AT4G33360	4
ath04141	Protein processing in endoplasmic reticulum	44	215	0.841444	0.999943	0.852946	AT1G09210/AT1G67490/AT4G02080/AT3G08690/AT5G49910/AT1G79940/AT5G02500/AT5G59300/AT1G19310/AT5G52640/AT3G17000/AT5G12020/AT5G56360/AT1G59860/AT1G53540/AT3G23660/AT5G42020/AT1G71220/AT4G21150/AT2G30050/AT4G25200/AT1G08450/AT1G16030/AT2G04030/AT3G09350/AT2G18710/AT5G14030/AT1G77510/AT4G27670/AT4G10250/AT4G24190/AT5G42570/AT1G51590/AT3G12580/AT5G60460/AT5G49060/AT3G07770/AT3G07190/AT2G17520/AT1G32210…	44
ath03040	Spliceosome	39	192	0.842276	0.999943	0.852946	AT1G17640/AT2G30260/AT5G49910/AT5G02500/AT2G41060/AT2G23930/AT5G08290/AT1G80070/AT4G35785/AT4G30220/AT1G02140/AT4G21110/AT1G07360/AT2G47330/AT3G50670/AT3G13570/AT1G16030/AT3G05760/AT4G22350/AT5G27720/AT2G38730/AT4G30330/AT1G02840/AT4G36690/AT1G03140/AT1G04510/AT1G20920/AT3G26560/AT4G01020/AT3G12580/AT1G27900/AT5G42820/AT3G18165/AT1G09760/AT1G65660/AT1G20960/AT5G64200/AT5G13010/AT5G58470	39
ath04136	Autophagy - other	7	41	0.865907	0.999943	0.852946	AT3G58500/AT2G44140/AT2G31260/AT4G29380/AT1G54210/AT1G10430/AT4G30790	7
ath00565	Ether lipid metabolism	4	26	0.881857	0.999943	0.852946	AT1G13560/AT3G15730/AT2G26870/AT2G42010	4
ath00904	Diterpenoid biosynthesis	3	21	0.893812	0.999943	0.852946	AT4G25420/AT1G30040/AT1G15550	3
ath03013	Nucleocytoplasmic transport	19	103	0.89443	0.999943	0.852946	AT5G47010/AT3G02420/AT2G30050/AT1G02140/AT2G39260/AT1G79280/AT1G15200/AT5G60390/AT1G33980/AT1G11400/AT3G14120/AT3G16310/AT5G53480/AT1G80670/AT1G80680/AT4G37130/AT1G73240/AT5G17020/AT2G46520	19
ath00950	Isoquinoline alkaloid biosynthesis	3	22	0.91152	0.999943	0.852946	AT5G11520/AT2G20340/AT4G12290	3
ath03008	Ribosome biogenesis in eukaryotes	18	101	0.919273	0.999943	0.852946	AT5G15750/AT2G26970/AT1G15420/AT3G07050/AT1G15440/AT5G22100/AT1G63780/AT4G17640/AT1G56110/AT1G50920/AT1G27470/AT2G18900/AT5G14050/AT3G21540/AT5G27120/AT1G10490/AT5G38720/AT5G17020	18
ath00603	Glycosphingolipid biosynthesis - globo and isoglobo series	1	11	0.944117	0.999943	0.852946	AT3G56310	1
ath00563	Glycosylphosphatidylinositol (GPI)-anchor biosynthesis	3	26	0.958559	0.999943	0.852946	AT1G63110/AT3G58130/AT3G45100	3
ath00966	Glucosinolate biosynthesis	3	26	0.958559	0.999943	0.852946	AT1G24100/AT5G65780/AT3G49680	3
ath03050	Proteasome	9	61	0.96126	0.999943	0.852946	AT2G20140/AT1G47250/AT3G22630/AT1G45000/AT3G22110/AT5G05780/AT2G32730/AT5G23540/AT1G21720	9
ath00970	Aminoacyl-tRNA biosynthesis	19	115	0.96736	0.999943	0.852946	AT3G46100/AT2G33840/AT5G27470/AT5G26830/AT1G29880/AT1G50200/AT3G04600/AT4G33760/AT4G17300/AT2G31170/AT3G55400/AT3G13490/AT3G58140/AT4G10320/AT1G48520/AT4G26300/AT3G11710/AT5G22800/AT5G56680	19
ath00460	Cyanoamino acid metabolism	10	70	0.976114	0.999943	0.852946	AT3G47000/AT4G37930/AT5G20950/AT3G61440/AT3G18080/AT5G04885/AT2G44450/AT3G16150/AT4G29210/AT5G54570	10
ath00960	Tropane, piperidine and pyridine alkaloid biosynthesis	4	36	0.979448	0.999943	0.852946	AT5G11520/AT5G06060/AT4G12290/AT2G29150	4
ath03420	Nucleotide excision repair	9	67	0.983525	0.999943	0.852946	AT1G50840/AT1G12400/AT1G07370/AT2G42120/AT1G08130/AT2G29570/AT2G18760/AT5G41370/AT1G18340	9
ath04075	Plant hormone signal transduction	52	289	0.986786	0.999943	0.852946	AT3G56850/AT1G19850/AT2G40330/AT3G63010/AT4G34760/AT2G38310/AT4G03400/AT3G20770/AT2G14580/AT5G53160/AT3G11410/AT3G04580/AT1G14920/AT1G09530/AT1G72770/AT2G25490/AT2G38120/AT1G59940/AT2G39940/AT4G39400/AT3G23240/AT2G21050/AT2G14960/AT1G07430/AT5G05440/AT2G36210/AT1G17550/AT2G46690/AT3G62980/AT4G17870/AT1G32640/AT3G12830/AT1G75080/AT1G01360/AT3G60690/AT4G34160/AT4G29080/AT3G04730/AT3G21510/AT1G75580…	52
ath03020	RNA polymerase	5	45	0.987502	0.999943	0.852946	AT5G49530/AT1G06790/AT1G60620/AT4G07950/AT5G60040	5
ath04120	Ubiquitin mediated proteolysis	24	155	0.993037	0.999943	0.852946	AT3G17205/AT3G08690/AT3G61790/AT5G59300/AT4G38600/AT4G36800/AT3G17000/AT4G10180/AT1G63800/AT2G16920/AT5G22920/AT3G20060/AT2G20000/AT1G21410/AT1G78770/AT2G32950/AT2G18600/AT1G04510/AT5G13840/AT5G03240/AT5G41580/AT1G78870/AT4G33270/AT4G05050	24
ath03022	Basal transcription factors	6	55	0.993587	0.999943	0.852946	AT1G12400/AT3G10330/AT1G03280/AT5G41370/AT1G18340/AT1G07470	6
ath03440	Homologous recombination	7	64	0.996043	0.999943	0.852946	AT1G50840/AT1G80210/AT1G79050/AT3G18580/AT2G31970/AT2G42120/AT2G01440	7
ath03010	Ribosome	62	364	0.99854	0.999943	0.852946	AT1G36240/AT5G59850/AT5G04800/AT5G28060/AT4G23620/AT5G35530/AT1G29070/AT2G33450/AT1G26880/AT3G63490/AT1G26910/AT4G27090/AT3G06680/AT2G36620/AT2G19720/AT5G54600/AT2G24090/AT1G07320/AT4G36130/AT5G40950/AT4G15000/AT5G14320/AT4G01310/AT5G61170/AT3G20230/AT3G16780/AT3G05560/AT1G29965/AT2G20060/AT3G24830/AT5G65220/AT3G27830/AT1G26740/AT1G79850/AT1G75350/AT4G18100/AT2G09990/AT1G14320/AT4G30930/AT5G24510…	62
ath00190	Oxidative phosphorylation	23	163	0.998612	0.999943	0.852946	AT4G10040/AT5G13430/AT1G01050/AT5G47630/AT2G07689/AT3G53620/AT4G09650/AT1G80230/AT5G56090/AT5G62670/AT2G24520/AT5G40650/AT2G18230/AT4G32260/AT4G39080/AT2G20360/AT3G47950/AT2G28520/AT5G11770/AT5G08530/AT1G78900/AT4G04640/AT5G09650	23
ath00040	Pentose and glucuronate interconversions	10	107	0.999943	0.999943	0.852946	AT4G13710/AT5G61410/AT4G24780/AT5G51970/AT5G19730/AT2G45220/AT3G55140/AT5G49650/AT2G21370/AT5G57655	10

## Sheet: S4SR vs. S4CR
ID	Description	GeneRatio	BgRatio	pvalue	p.adjust	qvalue	geneID	Count
ath01240	Biosynthesis of cofactors	101	250	4.76e-07	5.52e-05	4.76e-05	AT3G63410/AT1G02500/AT5G63570/AT1G50480/AT5G08415/AT5G20990/AT1G32440/AT3G16050/AT1G23360/AT4G00110/AT5G46290/AT3G18030/AT2G37250/AT3G11945/AT3G23820/AT3G18680/AT5G59750/AT1G50170/AT2G46110/AT4G37930/AT4G01690/AT1G44170/AT1G48320/AT1G23800/AT5G60340/AT3G49680/AT1G48030/AT2G30920/AT4G36940/AT1G18870/AT1G64970/AT1G17710/AT1G12350/AT5G28840/AT3G12670/AT2G16370/AT5G56090/AT4G25280/AT1G74960/AT4G26850…	101
ath01200	Carbon metabolism	106	272	1.93e-06	0.000112052	9.66e-05	AT5G18170/AT1G68010/AT5G24400/AT1G13700/AT1G50480/AT3G14420/AT5G14590/AT1G32440/AT3G04120/AT3G55800/AT3G15290/AT5G61410/AT5G11520/AT2G43750/AT1G11860/AT4G37930/AT1G79550/AT4G26530/AT5G44520/AT1G48030/AT2G44530/AT4G26270/AT4G35090/AT4G31810/AT1G65930/AT5G66760/AT5G58330/AT2G42600/AT3G50520/AT2G05710/AT2G22780/AT2G36460/AT2G13360/AT5G38430/AT1G13440/AT2G26080/AT4G38970/AT1G50460/AT1G42970/AT3G26650…	106
ath00630	Glyoxylate and dicarboxylate metabolism	36	78	0.000116327	0.00337347	0.00290817	AT1G68010/AT3G14420/AT3G48990/AT1G11860/AT4G37930/AT1G48030/AT4G35090/AT2G05710/AT2G22780/AT2G13360/AT5G38430/AT2G26080/AT3G16950/AT5G04140/AT1G04410/AT4G33010/AT4G17360/AT1G79870/AT5G37600/AT4G18360/AT1G53240/AT4G13930/AT1G12550/AT5G47720/AT4G16155/AT5G47435/AT4G32520/AT5G35630/AT1G67090/AT1G70580/AT3G15020/AT3G16910/AT4G26970/AT3G25530/AT1G80380/AT1G32470	36
ath01230	Biosynthesis of amino acids	87	244	0.000633167	0.0146895	0.0126633	AT1G02500/AT5G14590/AT1G32440/AT1G09795/AT3G04120/AT1G80560/AT5G61410/AT4G13430/AT4G38220/AT3G59890/AT5G11520/AT2G43750/AT4G37930/AT1G79550/AT3G02020/AT3G49680/AT4G26530/AT5G44520/AT2G37500/AT2G44530/AT4G26270/AT1G65930/AT5G17920/AT5G14800/AT3G01120/AT3G06350/AT3G48560/AT3G50520/AT2G05710/AT2G36460/AT1G80600/AT1G13440/AT2G45300/AT4G38970/AT5G63890/AT2G22910/AT1G11790/AT3G13110/AT3G12780/AT1G08250…	87
ath00260	Glycine, serine and threonine metabolism	31	70	0.000824294	0.0159364	0.0137382	AT1G68010/AT1G11860/AT4G37930/AT3G02020/AT1G48030/AT2G24580/AT3G50520/AT2G13360/AT2G26080/AT3G16950/AT1G22170/AT4G33010/AT4G11640/AT1G79870/AT4G13930/AT1G12550/AT1G08630/AT2G17630/AT4G16155/AT4G32520/AT1G70580/AT1G09780/AT4G12290/AT4G27070/AT4G34200/AT4G39660/AT4G02610/AT3G08860/AT1G18640/AT1G80380/AT1G32470	31
ath00010	Glycolysis / Gluconeogenesis	47	119	0.00104011	0.017236	0.0148587	AT1G77120/AT1G32440/AT3G04120/AT1G44170/AT1G23800/AT1G79550/AT4G26530/AT1G48030/AT4G26270/AT3G01590/AT3G50520/AT3G48000/AT2G36460/AT1G13440/AT4G38970/AT1G50460/AT1G12000/AT4G33070/AT5G43940/AT3G16950/AT1G54220/AT3G12780/AT1G20950/AT1G22170/AT2G19860/AT1G56190/AT4G37870/AT5G64380/AT4G17260/AT3G61610/AT3G54050/AT4G16155/AT1G34430/AT3G25860/AT3G22960/AT3G16910/AT1G09780/AT4G36250/AT2G22480/AT5G42250…	47
ath00860	Porphyrin and chlorophyll metabolism	24	53	0.00215564	0.0312569	0.0269456	AT5G63570/AT1G74470/AT4G22920/AT1G50170/AT4G01690/AT3G09150/AT1G44000/AT5G56090/AT3G14930/AT5G08280/AT5G54190/AT5G18660/AT2G26670/AT4G18480/AT5G45930/AT5G26030/AT4G25080/AT1G69740/AT5G04900/AT4G13250/AT1G58290/AT3G44880/AT1G44446/AT3G56940	24
ath00770	Pantothenate and CoA biosynthesis	17	34	0.00260724	0.0336044	0.0289693	AT1G65840/AT3G18030/AT2G46110/AT1G44170/AT1G23800/AT3G49680/AT1G12350/AT3G48560/AT3G48000/AT3G23940/AT5G12200/AT5G65780/AT4G36250/AT2G31810/AT2G43020/AT2G27490/AT4G29680	17
ath00670	One carbon pool by folate	11	21	0.00961977	0.0929911	0.0801647	AT1G50480/AT1G11860/AT4G37930/AT1G31220/AT2G16370/AT5G13050/AT4G17360/AT4G13930/AT5G47435/AT4G32520/AT1G66520	11
ath00620	Pyruvate metabolism	36	97	0.0121077	0.108038	0.093136	AT1G77120/AT1G32440/AT1G44170/AT1G23800/AT1G48030/AT5G58330/AT2G42600/AT3G48000/AT2G22780/AT1G67280/AT5G43940/AT3G16950/AT1G54220/AT5G16390/AT1G04410/AT1G36160/AT4G37870/AT4G17260/AT1G53240/AT2G13560/AT1G79750/AT5G47720/AT4G16155/AT1G34430/AT3G25860/AT3G15020/AT3G22960/AT3G16910/AT4G36250/AT5G42250/AT2G38040/AT5G24760/AT3G14940/AT5G50850/AT1G53310/AT5G08570	36
ath00250	Alanine, aspartate and glutamate metabolism	21	51	0.0145724	0.120742	0.104088	AT5G18170/AT5G17330/AT5G12040/AT5G11520/AT2G13360/AT3G57610/AT1G72330/AT4G34740/AT5G62530/AT5G37600/AT5G10240/AT3G16150/AT5G35630/AT1G70580/AT5G53460/AT3G20330/AT1G51720/AT4G39660/AT5G10920/AT3G08860/AT3G47340	21
ath00310	Lysine degradation	14	31	0.017997	0.139177	0.11998	AT1G44170/AT1G23800/AT1G48030/AT2G24580/AT3G48000/AT2G23380/AT3G16950/AT5G13960/AT5G47720/AT4G16155/AT4G36250/AT2G35160/AT5G04940/AT3G03750	14
ath00906	Carotenoid biosynthesis	13	29	0.0238643	0.16863	0.14537	AT3G19270/AT2G27150/AT5G17230/AT1G52340/AT1G10830/AT4G25700/AT5G67030/AT1G08550/AT2G29090/AT4G14210/AT5G57030/AT3G10230/AT1G30100	13
ath00500	Starch and sucrose metabolism	52	171	0.024713	0.16863	0.14537	AT2G35840/AT5G48300/AT2G39930/AT1G04920/AT1G23870/AT5G45300/AT3G47000/AT3G43190/AT3G13560/AT1G27680/AT1G78580/AT5G20950/AT3G13790/AT2G01630/AT3G18080/AT5G24300/AT4G17090/AT1G06410/AT2G40840/AT1G32900/AT5G04885/AT4G02290/AT4G02280/AT1G62660/AT1G50460/AT1G26560/AT4G15210/AT2G19860/AT1G66250/AT1G11820/AT1G03310/AT1G12240/AT5G64860/AT2G44450/AT4G39210/AT3G29320/AT4G00490/AT5G51460/AT5G11720/AT5G49720…	52
ath00052	Galactose metabolism	22	57	0.0281007	0.181093	0.156115	AT5G52560/AT1G56600/AT5G40390/AT4G26270/AT3G13790/AT1G60470/AT4G01970/AT1G62660/AT3G54440/AT3G56310/AT1G50460/AT2G19860/AT1G72990/AT2G47180/AT1G12240/AT5G20250/AT5G11720/AT3G57520/AT2G36190/AT2G22480/AT1G55740/AT4G29130	22
ath00130	Ubiquinone and other terpenoid-quinone biosynthesis	16	39	0.0320538	0.195697	0.168704	AT3G63410/AT3G21240/AT1G23360/AT3G11945/AT1G48320/AT2G30920/AT1G18870/AT1G64970/AT5G08740/AT5G63380/AT4G23660/AT1G68890/AT2G30490/AT4G32770/AT1G30520/AT4G36750	16
ath00340	Histidine metabolism	9	19	0.0392722	0.216932	0.187011	AT1G09795/AT1G44170/AT1G23800/AT3G48000/AT5G63890/AT4G14910/AT4G36250/AT4G39120/AT1G31860	9
ath00511	Other glycan degradation	9	19	0.0392722	0.216932	0.187011	AT5G61540/AT5G66150/AT3G54440/AT1G05590/AT1G72990/AT2G28100/AT3G55260/AT3G26720/AT4G34260	9
ath00640	Propanoate metabolism	17	41	0.0496227	0.252153	0.187011	AT1G48030/AT4G31810/AT4G04320/AT3G16950/AT2G14170/AT1G06290/AT5G16390/AT1G36160/AT5G09300/AT2G20420/AT4G17260/AT4G16155/AT5G23250/AT4G13360/AT2G38040/AT1G21400/AT5G65110	17
ath00513	Various types of N-glycan biosynthesis	13	32	0.0548535	0.278289	0.239905	AT1G26810/AT1G30000/AT4G21150/AT1G05590/AT1G16570/AT1G71990/AT5G55500/AT1G51590/AT4G18230/AT1G34130/AT4G16710/AT1G61790/AT3G55260	13
ath00650	Butanoate metabolism	9	20	0.055178	0.278289	0.239905	AT5G17330/AT3G15290/AT3G48560/AT3G56840/AT5G47720/AT3G16910/AT2G31810/AT3G25530/AT2G26800	9
ath00230	Purine metabolism	34	101	0.0602984	0.291442	0.251243	AT3G21110/AT1G32440/AT2G37250/AT2G21790/AT2G14750/AT2G42070/AT5G60340/AT5G11160/AT3G03900/AT2G44530/AT3G55010/AT3G17470/AT5G66005/AT5G03300/AT1G31220/AT4G13720/AT4G12440/AT1G74260/AT3G57610/AT5G35170/AT4G04880/AT5G47840/AT4G34740/AT4G02260/AT2G38280/AT3G22960/AT1G72880/AT4G24730/AT4G29680/AT2G37690/AT4G11980/AT5G08570/AT4G09320/AT1G63660	34
ath00280	Valine, leucine and isoleucine degradation	19	52	0.0675144	0.313267	0.270057	AT3G16170/AT1G44170/AT1G23800/AT3G49680/AT1G48030/AT4G31810/AT3G48000/AT3G16950/AT2G14170/AT5G09300/AT5G47720/AT4G16155/AT5G65780/AT4G36250/AT4G13360/AT4G39660/AT3G08860/AT2G26800/AT1G21400	19
ath00790	Folate biosynthesis	12	30	0.0713404	0.318288	0.274386	AT5G20990/AT5G59750/AT3G59710/AT2G16370/AT3G07270/AT5G41480/AT5G57850/AT1G78680/AT2G28880/AT1G01290/AT1G16540/AT5G64300	12
ath00730	Thiamine metabolism	9	21	0.0747249	0.321041	0.276759	AT2G37250/AT5G66005/AT5G54770/AT5G35170/AT5G47840/AT4G15560/AT5G65720/AT1G02880/AT2G29630	9
ath00020	Citrate cycle (TCA cycle)	22	63	0.0816222	0.338149	0.291508	AT5G14590/AT1G48030/AT1G65930/AT5G66760/AT2G05710/AT2G22780/AT3G16950/AT1G54220/AT1G04410/AT4G37870/AT2G20420/AT1G60810/AT5G65750/AT1G53240/AT5G40650/AT4G16155/AT1G34430/AT3G25860/AT3G15020/AT5G23250/AT4G26970/AT5G50850	22
ath00071	Fatty acid degradation	17	47	0.0880152	0.352061	0.303501	AT1G77120/AT1G69500/AT1G44170/AT1G23800/AT5G58860/AT2G04350/AT3G48000/AT5G43940/AT3G06860/AT1G06290/AT4G14440/AT1G49430/AT5G47720/AT4G36250/AT5G42250/AT5G24760/AT5G65110	17
ath00531	Glycosaminoglycan degradation	5	10	0.094532	0.364153	0.313925	AT5G07830/AT1G05590/AT1G72990/AT5G27730/AT3G55260	5
ath00514	Other types of O-glycan biosynthesis	6	13	0.0991916	0.364153	0.313925	AT3G04240/AT2G35610/AT5G13500/AT3G01720/AT1G19360/AT5G50420	6
ath00780	Biotin metabolism	7	16	0.100456	0.364153	0.313925	AT5G46290/AT1G74960/AT2G05990/AT2G43360/AT2G22230/AT4G13180/AT5G10160	7
ath04145	Phagosome	27	83	0.123017	0.41059	0.353957	AT3G14270/AT4G35020/AT1G75780/AT4G32530/AT4G28950/AT5G12250/AT5G62700/AT5G45970/AT1G08450/AT3G42050/AT2G34250/AT1G09210/AT3G48040/AT2G18710/AT1G75840/AT3G28715/AT5G19780/AT5G23860/AT4G39080/AT2G28520/AT2G21880/AT5G55290/AT4G38510/AT1G78900/AT2G17800/AT4G09720/AT4G33240	27
ath00510	N-Glycan biosynthesis	16	46	0.128724	0.41059	0.353957	AT1G67490/AT1G30000/AT3G27540/AT4G21150/AT5G38460/AT2G44660/AT1G12990/AT1G16570/AT1G51590/AT4G18230/AT1G34130/AT1G48140/AT4G16710/AT1G61790/AT3G45040/AT2G13290	16
ath00590	Arachidonic acid metabolism	8	20	0.129544	0.41059	0.353957	AT2G06925/AT2G31570/AT4G11600/AT1G63460/AT3G59710/AT5G13520/AT4G31870/AT4G29210	8
ath04146	Peroxisome	28	87	0.130964	0.41059	0.353957	AT2G39970/AT5G19750/AT3G14420/AT5G14590/AT1G79810/AT3G03490/AT2G24580/AT4G35090/AT1G65930/AT3G07560/AT2G04350/AT4G04320/AT2G13360/AT3G04460/AT1G06290/AT1G48635/AT1G03000/AT4G18360/AT1G49430/AT2G01490/AT3G12800/AT5G23310/AT2G14860/AT4G33790/AT4G03410/AT4G04470/AT2G26800/AT5G65110	28
ath00061	Fatty acid biosynthesis	15	43	0.135714	0.414285	0.357142	AT5G46290/AT3G45770/AT3G16170/AT2G04350/AT1G74960/AT2G05990/AT2G43710/AT5G16390/AT2G22230/AT1G36160/AT1G49430/AT4G13180/AT5G10160/AT1G08510/AT2G38040	15
ath00240	Pyrimidine metabolism	20	61	0.157521	0.458645	0.395384	AT3G18680/AT2G21790/AT5G59440/AT1G50510/AT3G12670/AT2G16370/AT4G25280/AT3G25400/AT1G30820/AT5G23070/AT3G46940/AT3G07800/AT4G22930/AT5G12200/AT1G72880/AT3G20330/AT4G29680/AT1G73980/AT3G54470/AT4G09320	20
ath00290	Valine, leucine and isoleucine biosynthesis	8	21	0.163279	0.458645	0.395384	AT1G80560/AT4G13430/AT3G49680/AT3G48560/AT2G43090/AT3G23940/AT5G65780/AT2G31810	8
ath00030	Pentose phosphate pathway	19	58	0.166355	0.458645	0.395384	AT5G24400/AT1G13700/AT5G61410/AT4G26530/AT5G44520/AT2G44530/AT4G26270/AT2G36460/AT4G38970/AT1G12000/AT1G17160/AT1G20950/AT5G64380/AT2G01290/AT3G54050/AT3G04790/AT2G22480/AT3G60750/AT2G24270	19
ath03030	DNA replication	16	48	0.172489	0.458645	0.395384	AT1G50840/AT5G26680/AT5G44635/AT2G06510/AT4G18590/AT3G18580/AT2G16440/AT1G07370/AT2G42120/AT1G08130/AT2G29570/AT5G41880/AT4G02060/AT5G46280/AT5G08020/AT1G44900	16
ath00750	Vitamin B6 metabolism	6	15	0.179074	0.458645	0.395384	AT3G16050/AT5G49970/AT1G17710/AT5G53580/AT2G17630/AT5G60540	6
ath00941	Flavonoid biosynthesis	9	25	0.189175	0.458645	0.395384	AT5G13930/AT2G40890/AT3G51240/AT4G34050/AT5G08640/AT2G30490/AT1G61720/AT5G07990/AT4G22880	9
ath03015	mRNA surveillance pathway	36	119	0.189629	0.458645	0.395384	AT4G25550/AT3G26618/AT3G58500/AT5G25510/AT5G47010/AT5G28850/AT1G61010/AT5G18580/AT1G51690/AT1G17720/AT3G07810/AT5G28900/AT2G29210/AT4G34110/AT2G39840/AT5G60940/AT1G17980/AT1G51510/AT1G49760/AT5G65260/AT1G13460/AT1G10430/AT3G52210/AT1G15200/AT2G42500/AT5G01400/AT1G33980/AT1G58470/AT5G10630/AT1G11400/AT1G73820/AT5G13480/AT2G45640/AT1G27595/AT3G09880/AT4G15415	36
ath00920	Sulfur metabolism	14	42	0.193512	0.458645	0.395384	AT2G14750/AT2G43750/AT3G03900/AT3G01120/AT4G05090/AT3G01910/AT4G21990/AT3G13110/AT5G04590/AT4G14880/AT5G56760/AT3G59760/AT1G53580/AT1G79230	14
ath00051	Fructose and mannose metabolism	20	63	0.199519	0.458645	0.395384	AT5G01930/AT5G51970/AT4G26530/AT4G26270/AT1G07110/AT2G20680/AT2G36460/AT2G45790/AT2G39770/AT4G38970/AT1G50460/AT1G12000/AT1G20950/AT2G19860/AT5G64380/AT3G54050/AT2G22480/AT4G11980/AT4G29130/AT5G57655	20
ath00053	Ascorbate and aldarate metabolism	20	63	0.199519	0.458645	0.395384	AT4G00110/AT5G52560/AT3G23820/AT3G27820/AT1G44170/AT1G14520/AT1G23800/AT5G28840/AT4G26850/AT3G48000/AT4G33670/AT3G47930/AT5G03630/AT4G35000/AT3G29360/AT4G09010/AT4G36250/AT5G15490/AT4G39120/AT2G19800	20
ath01212	Fatty acid metabolism	22	70	0.199533	0.458645	0.395384	AT5G46290/AT3G45770/AT3G16170/AT5G10480/AT2G04350/AT1G74960/AT2G05990/AT2G43710/AT3G12120/AT3G06860/AT1G06290/AT5G16390/AT2G22230/AT1G36160/AT1G49430/AT4G13180/AT5G10160/AT5G47720/AT3G55360/AT1G08510/AT2G38040/AT5G65110	22
ath00270	Cysteine and methionine metabolism	36	120	0.205565	0.458645	0.395384	AT1G02500/AT4G13940/AT1G77670/AT5G11520/AT2G43750/AT3G25570/AT3G02020/AT3G49680/AT5G17920/AT3G01120/AT4G34840/AT2G22780/AT3G13110/AT4G23100/AT3G63250/AT1G04410/AT2G36880/AT4G14880/AT4G37770/AT4G17260/AT1G53240/AT5G56760/AT2G17630/AT5G65780/AT3G15020/AT4G19020/AT3G59760/AT4G34200/AT4G39660/AT3G08860/AT2G19590/AT1G79230/AT5G26600/AT5G49160/AT1G70310/AT1G05010	36
ath03018	RNA degradation	34	113	0.208144	0.458645	0.395384	AT3G58580/AT1G75660/AT1G31500/AT1G55870/AT4G32175/AT3G14080/AT1G07705/AT4G00660/AT4G26270/AT5G60170/AT3G03710/AT4G34110/AT1G03905/AT5G09590/AT2G32070/AT1G08370/AT1G49760/AT5G22250/AT5G25080/AT3G13860/AT3G44260/AT2G17510/AT3G13300/AT3G13470/AT5G18230/AT1G59760/AT2G22480/AT5G02270/AT2G35920/AT1G03330/AT1G76630/AT2G29560/AT1G26230/AT2G36530	34
ath00740	Riboflavin metabolism	7	19	0.212905	0.458645	0.395384	AT5G59750/AT2G42070/AT1G25230/AT4G20960/AT4G29680/AT4G21470/AT5G64300	7
ath00564	Glycerophospholipid metabolism	30	99	0.213098	0.458645	0.395384	AT2G06925/AT1G13560/AT2G42010/AT1G52570/AT3G02600/AT1G80860/AT3G02040/AT3G15730/AT2G39290/AT2G26830/AT3G18000/AT2G26870/AT1G43710/AT5G63770/AT1G62430/AT4G35790/AT4G00400/AT1G15110/AT2G18730/AT2G20900/AT3G03310/AT3G10370/AT5G40610/AT5G60620/AT4G24730/AT2G40690/AT1G75020/AT2G38670/AT1G74210/AT2G38110	30
ath00062	Fatty acid elongation	12	36	0.218167	0.458645	0.395384	AT3G45770/AT1G19440/AT2G26640/AT5G10480/AT1G68530/AT2G28630/AT1G04220/AT5G04530/AT2G26250/AT1G01120/AT3G55360/AT1G01710	12
ath00220	Arginine biosynthesis	12	36	0.218167	0.458645	0.395384	AT5G18170/AT4G38220/AT5G11520/AT2G37500/AT1G80600/AT2G22910/AT1G72330/AT5G37600/AT5G35630/AT1G70580/AT1G51720/AT5G10920	12
ath00910	Nitrogen metabolism	14	43	0.221415	0.458645	0.395384	AT5G18170/AT3G01500/AT2G28210/AT1G12940/AT5G60770/AT1G37130/AT4G33580/AT5G04140/AT5G14570/AT5G37600/AT5G35630/AT5G53460/AT1G51720/AT1G08080	14
ath00900	Terpenoid backbone biosynthesis	19	61	0.23498	0.464582	0.400502	AT1G74470/AT4G38460/AT4G01320/AT4G34350/AT5G47770/AT5G58770/AT4G36810/AT1G78510/AT1G76490/AT5G60600/AT5G62790/AT2G02500/AT1G26120/AT5G47720/AT4G15560/AT2G36305/AT3G54250/AT1G17050/AT4G33360	19
ath00330	Arginine and proline metabolism	18	54	0.236061	0.464582	0.400502	AT3G28480/AT1G65840/AT5G11520/AT1G44170/AT3G25570/AT1G23800/AT4G34880/AT5G14800/AT5G18900/AT3G48000/AT1G20270/AT5G62530/AT5G38710/AT4G36250/AT2G43020/AT2G16500/AT1G70310/AT3G55610	17
ath00410	beta-Alanine metabolism	15	47	0.236296	0.464582	0.400502	AT5G17330/AT1G65840/AT1G44170/AT1G23800/AT4G31810/AT3G48000/AT4G04320/AT2G14170/AT1G06290/AT5G12200/AT4G36250/AT4G12290/AT2G43020/AT4G13360/AT5G65110	15
ath00520	Amino sugar and nucleotide sugar metabolism	39	133	0.242031	0.467926	0.403384	AT1G08200/AT5G48300/AT4G33030/AT3G53520/AT4G00110/AT5G52560/AT3G23820/AT1G27680/AT2G28760/AT3G02350/AT5G28840/AT2G45790/AT5G24090/AT2G39770/AT1G78570/AT1G50460/AT1G05590/AT4G38270/AT1G02730/AT3G10740/AT2G19860/AT4G39210/AT2G38650/AT3G54420/AT3G29360/AT1G18580/AT3G19620/AT5G15650/AT5G64570/AT2G35020/AT5G19220/AT5G15490/AT1G30620/AT3G55260/AT3G02230/AT4G29130/AT3G06580/AT5G47780/AT1G31070	39
ath04712	Circadian rhythm - plant	12	39	0.319099	0.604446	0.521074	AT5G11260/AT2G18790/AT5G13930/AT5G02810/AT5G57360/AT1G09530/AT4G08920/AT4G17640/AT5G23280/AT2G46790/AT1G22770/AT3G50000	12
ath02010	ABC transporters	10	32	0.324076	0.604446	0.521074	AT1G27940/AT2G07680/AT5G58270/AT5G06530/AT2G36910/AT3G28345/AT3G28860/AT2G41700/AT4G25960/AT2G47000	10
ath00450	Selenocompound metabolism	6	18	0.329597	0.604446	0.521074	AT4G13780/AT5G17920/AT3G01120/AT2G17420/AT3G55400/AT2G41680	6
ath00592	alpha-Linolenic acid metabolism	13	43	0.333488	0.604446	0.521074	AT1G77120/AT2G06925/AT1G67560/AT2G06050/AT3G06860/AT1G06290/AT3G45140/AT5G42650/AT1G13280/AT1G19640/AT3G03310/AT1G76690/AT5G65110	13
ath00600	Sphingolipid metabolism	9	29	0.347393	0.619963	0.534451	AT4G22330/AT1G07380/AT1G27980/AT3G54440/AT3G56310/AT4G04930/AT1G14290/AT1G72990/AT5G51290	9
ath00561	Glycerolipid metabolism	19	66	0.369465	0.644964	0.556003	AT4G33030/AT1G44170/AT1G23800/AT3G02600/AT2G19450/AT5G13640/AT3G48000/AT1G11090/AT3G56310/AT3G11670/AT5G63770/AT4G00400/AT2G18730/AT2G20900/AT5G60620/AT4G36250/AT1G75020/AT1G80380/AT2G38110	19
ath00480	Glutathione metabolism	29	103	0.372522	0.644964	0.556003	AT1G17180/AT5G14590/AT2G31570/AT2G24200/AT2G21790/AT4G11600/AT1G63460/AT2G47730/AT1G78380/AT5G26220/AT1G65930/AT2G30860/AT1G10370/AT3G09270/AT3G54660/AT4G23100/AT1G78320/AT3G55040/AT4G35000/AT5G37830/AT1G48130/AT1G63770/AT4G31870/AT1G65820/AT4G09010/AT4G30920/AT5G41210/AT4G29210/AT1G70310	29
ath01250	Biosynthesis of nucleotide sugars	28	100	0.388859	0.663348	0.571852	AT1G08200/AT5G48300/AT4G33030/AT3G53520/AT4G00110/AT5G52560/AT3G23820/AT1G27680/AT1G14520/AT2G28760/AT5G28840/AT2G45790/AT2G39770/AT1G78570/AT1G50460/AT2G19860/AT4G39210/AT3G29360/AT5G15650/AT2G35020/AT5G19220/AT5G15490/AT1G30620/AT2G19800/AT3G02230/AT4G29130/AT3G06580/AT1G31070	28
ath03410	Base excision repair	12	43	0.465054	0.781831	0.673992	AT1G50840/AT5G26680/AT1G21710/AT5G57970/AT1G13635/AT5G44680/AT1G07370/AT2G42120/AT1G08130/AT2G29570/AT3G51880/AT2G31320	12
ath00904	Diterpenoid biosynthesis	6	21	0.490215	0.801882	0.691277	AT1G02400/AT5G51810/AT4G25420/AT2G32440/AT1G30040/AT1G15550	6
ath01210	2-Oxocarboxylic acid metabolism	20	74	0.490807	0.801882	0.691277	AT5G14590/AT1G80560/AT4G13430/AT4G38220/AT5G11520/AT3G02020/AT3G49680/AT2G37500/AT1G65930/AT3G48560/AT2G05710/AT1G80600/AT2G22910/AT1G72330/AT2G43090/AT3G23940/AT5G65780/AT1G70580/AT2G31810/AT4G26970	20
ath01040	Biosynthesis of unsaturated fatty acids	7	25	0.500806	0.806854	0.695564	AT5G10480/AT2G43710/AT3G12120/AT1G06290/AT3G55360/AT1G01710/AT5G65110	7
ath03430	Mismatch repair	10	37	0.524815	0.833952	0.718924	AT2G06510/AT4G18590/AT3G18580/AT4G02460/AT1G07370/AT2G42120/AT1G08130/AT2G29570/AT4G02070/AT5G08020	10
ath00563	Glycosylphosphatidylinositol (GPI)-anchor biosynthesis	7	26	0.547692	0.847098	0.730257	AT1G63110/AT3G58130/AT5G22130/AT2G39445/AT1G08750/AT3G45100/AT3G27325	7
ath00565	Ether lipid metabolism	7	26	0.547692	0.847098	0.730257	AT2G06925/AT1G13560/AT2G42010/AT1G52570/AT3G15730/AT2G26870/AT4G35790	7
ath04141	Protein processing in endoplasmic reticulum	56	215	0.566408	0.864518	0.745274	AT3G58030/AT1G04850/AT1G27520/AT1G21750/AT1G67490/AT4G02080/AT2G23780/AT1G79940/AT5G02500/AT1G50670/AT1G35620/AT5G42570/AT5G52640/AT1G30000/AT3G17000/AT4G04860/AT5G12020/AT5G49910/AT5G56360/AT1G53540/AT5G56000/AT1G71220/AT3G09350/AT4G21150/AT4G25200/AT5G60640/AT5G15400/AT1G08450/AT3G02540/AT5G22060/AT2G34250/AT1G16030/AT2G04030/AT1G09210/AT2G18710/AT3G07100/AT5G59300/AT2G47470/AT5G14030/AT5G49060…	56
ath00603	Glycosphingolipid biosynthesis - globo and isoglobo series	3	11	0.585655	0.871831	0.751579	AT3G56310/AT1G05590/AT3G55260	3
ath00300	Lysine biosynthesis	4	15	0.586231	0.871831	0.751579	AT3G59890/AT3G02020/AT4G33680/AT2G44040	4
ath00100	Steroid biosynthesis	9	36	0.63528	0.932816	0.804152	AT1G20330/AT1G58440/AT2G34500/AT1G11680/AT4G34640/AT3G52940/AT5G50375/AT1G20050/AT4G37760	9
ath04070	Phosphatidylinositol signaling system	19	77	0.672891	0.975692	0.841113	AT1G49340/AT3G14270/AT1G21980/AT3G19420/AT5G21274/AT1G31190/AT4G08170/AT3G08510/AT5G16760/AT5G63770/AT1G62430/AT3G43810/AT2G18730/AT1G22100/AT2G20900/AT5G49480/AT4G39120/AT3G09920/AT4G33240	19
ath04122	Sulfur relay system	3	13	0.706672	0.998732	0.860976	AT1G01290/AT5G65720/AT1G79230	3
ath04144	Endocytosis	39	158	0.712973	0.998732	0.860976	AT5G11710/AT3G20290/AT5G45750/AT5G02500/AT2G31680/AT1G60430/AT5G06140/AT2G37550/AT2G42010/AT1G52570/AT3G60860/AT4G18800/AT1G21980/AT5G49910/AT5G46630/AT1G13180/AT3G17660/AT1G47830/AT2G36680/AT1G16030/AT3G15730/AT3G46540/AT4G35790/AT1G15130/AT1G30825/AT3G08530/AT1G10630/AT5G04920/AT3G62290/AT5G13300/AT5G65270/AT3G12580/AT2G21880/AT4G38200/AT5G22950/AT3G27000/AT4G09720/AT3G11130/AT3G09920	39
ath04130	SNARE interactions in vesicular transport	11	47	0.728528	0.998732	0.860976	AT2G36900/AT3G05710/AT3G24350/AT1G15880/AT1G08560/AT2G18260/AT3G58170/AT3G11820/AT2G45200/AT3G55600/AT5G22360	11
ath00760	Nicotinate and nicotinamide metabolism	4	18	0.738305	0.998732	0.860976	AT4G36940/AT1G55090/AT1G72880/AT4G29680	4
ath00380	Tryptophan metabolism	15	64	0.745477	0.998732	0.860976	AT1G26220/AT5G54160/AT1G44170/AT1G23800/AT1G48030/AT4G34880/AT4G35090/AT3G48000/AT3G16950/AT2G20340/AT4G24670/AT1G14130/AT5G47720/AT4G16155/AT4G36250	15
ath00400	Phenylalanine, tyrosine and tryptophan biosynthesis	13	56	0.749533	0.998732	0.860976	AT5G11520/AT3G06350/AT2G45300/AT1G11790/AT1G08250/AT3G29200/AT4G39980/AT5G17990/AT5G10870/AT4G27070/AT3G07630/AT4G02610/AT5G48220	13
ath00261	Monobactam biosynthesis	3	14	0.756096	0.998732	0.860976	AT3G59890/AT3G02020/AT2G44040	3
ath03008	Ribosome biogenesis in eukaryotes	24	101	0.757659	0.998732	0.860976	AT5G15750/AT1G75660/AT3G07050/AT5G60340/AT1G15440/AT5G22100/AT5G66540/AT1G63780/AT4G17640/AT5G17020/AT1G56110/AT1G27470/AT2G18900/AT1G15420/AT2G20490/AT3G03920/AT3G21540/AT2G03820/AT1G06720/AT5G38720/AT3G50000/AT5G16750/AT1G04635/AT1G08410	24
ath00350	Tyrosine metabolism	9	41	0.790636	0.999338	0.861498	AT1G77120/AT5G11520/AT2G02380/AT5G43940/AT2G20340/AT1G12050/AT4G12290/AT5G42250/AT5G24760	9
ath04136	Autophagy - other	9	41	0.790636	0.999338	0.861498	AT5G53000/AT3G58500/AT4G16520/AT2G31260/AT3G18770/AT1G54210/AT1G10430/AT2G42500/AT4G30790	9
ath03013	Nucleocytoplasmic transport	24	103	0.792263	0.999338	0.861498	AT5G05680/AT5G47010/AT3G02420/AT5G56130/AT5G42920/AT1G59660/AT2G29210/AT5G17020/AT1G51510/AT2G45000/AT5G60390/AT1G15200/AT2G31660/AT1G33980/AT3G56900/AT5G53480/AT1G11400/AT3G14120/AT2G45640/AT4G37130/AT3G63130/AT2G03820/AT1G80670/AT2G46520	24
ath00073	Cutin, suberine and wax biosynthesis	8	37	0.797291	0.999338	0.861498	AT1G69500/AT1G02205/AT5G58860/AT1G72970/AT5G04660/AT4G00360/AT4G33790/AT5G23190	8
ath00562	Inositol phosphate metabolism	18	79	0.801193	0.999338	0.861498	AT4G18010/AT1G49340/AT3G14270/AT2G22240/AT1G14520/AT1G21980/AT3G19420/AT1G31190/AT4G08170/AT3G08510/AT2G14170/AT5G16760/AT2G26870/AT1G22100/AT4G39120/AT2G19800/AT3G09920/AT4G33240	18
ath03440	Homologous recombination	14	64	0.83076	0.999911	0.861993	AT1G50840/AT1G80210/AT2G06510/AT1G79050/AT4G18590/AT3G18580/AT2G31970/AT3G19210/AT1G04020/AT2G42120/AT2G32000/AT2G01440/AT5G08020/AT2G16390	14
ath03420	Nucleotide excision repair	14	67	0.878374	0.999911	0.861993	AT1G50840/AT2G06510/AT1G18040/AT4G18590/AT3G02540/AT1G07370/AT2G42120/AT1G08130/AT2G29570/AT5G27620/AT2G18760/AT1G18340/AT5G08020/AT5G46210	14
ath00909	Sesquiterpenoid and triterpenoid biosynthesis	4	23	0.892197	0.999911	0.861993	AT1G58440/AT4G34640/AT4G37760/AT4G33360	4
ath00360	Phenylalanine metabolism	6	33	0.901528	0.999911	0.861993	AT3G15290/AT5G11520/AT4G34880/AT2G37040/AT2G20340/AT4G12290	6
ath00940	Phenylpropanoid biosynthesis	39	176	0.916331	0.999911	0.861993	AT5G05340/AT3G21240/AT4G39330/AT3G47000/AT5G54160/AT2G40890/AT4G34050/AT3G62860/AT4G21960/AT5G20950/AT3G18080/AT1G14550/AT5G67400/AT2G37040/AT4G36220/AT3G13610/AT3G19450/AT2G37130/AT5G63380/AT5G04885/AT1G15950/AT5G42180/AT1G26560/AT4G25980/AT1G48130/AT2G30490/AT1G44970/AT4G37980/AT2G44450/AT1G71695/AT4G33420/AT5G06720/AT1G52760/AT3G24503/AT5G14130/AT5G51890/AT1G02850/AT5G54570/AT2G22420	39
ath04016	MAPK signaling pathway - plant	30	139	0.919817	0.999911	0.861993	AT2G40330/AT3G23240/AT1G07430/AT3G20770/AT3G25250/AT2G43790/AT1G60940/AT2G14580/AT5G53160/AT2G26070/AT4G35090/AT5G21274/AT4G08480/AT1G63440/AT4G01370/AT2G40940/AT1G72770/AT2G25490/AT4G33950/AT3G43810/AT3G04580/AT4G08500/AT5G49480/AT4G33430/AT3G11410/AT2G32510/AT3G45640/AT1G10210/AT4G33520/AT4G09320	30
ath04075	Plant hormone signal transduction	66	289	0.929491	0.999911	0.861993	AT3G56850/AT1G19850/AT4G34750/AT2G40330/AT3G63010/AT3G23240/AT4G14550/AT2G39940/AT1G07430/AT3G20770/AT3G62980/AT4G34760/AT2G43790/AT1G60940/AT2G14580/AT5G53160/AT5G54510/AT4G16110/AT5G13220/AT1G09530/AT1G75580/AT1G06390/AT5G06950/AT2G14960/AT1G59940/AT2G01570/AT2G38120/AT5G45110/AT1G45249/AT2G40940/AT2G36210/AT3G48100/AT1G72770/AT2G46690/AT4G34160/AT4G23980/AT2G25490/AT2G21050/AT4G33950/AT3G12830…	66
ath03060	Protein export	10	54	0.933442	0.999911	0.861993	AT1G79940/AT2G45770/AT3G24590/AT1G52600/AT2G34250/AT2G18710/AT2G28800/AT2G43640/AT1G53530/AT5G03940	10
ath04626	Plant-pathogen interaction	45	204	0.934981	0.999911	0.861993	AT2G24610/AT5G56580/AT4G20360/AT1G19440/AT2G26640/AT2G43790/AT2G14580/AT2G17290/AT5G52640/AT1G68530/AT5G42380/AT2G28260/AT2G28630/AT1G04220/AT5G56000/AT5G21274/AT3G57530/AT3G25600/AT3G51850/AT1G76650/AT5G04530/AT2G41410/AT4G20780/AT4G01370/AT1G74740/AT2G04030/AT2G15680/AT5G53130/AT2G26250/AT4G01010/AT4G14440/AT1G01120/AT3G43810/AT5G13160/AT4G08500/AT5G49480/AT4G39090/AT4G24190/AT3G07770/AT4G33430…	45
ath03040	Spliceosome	42	192	0.937325	0.999911	0.861993	AT1G17640/AT2G30260/AT5G02500/AT1G14650/AT5G56130/AT5G49910/AT5G08290/AT4G30220/AT4G35785/AT4G21110/AT4G25500/AT2G47330/AT3G18790/AT3G50670/AT3G13570/AT1G16030/AT1G20580/AT4G22350/AT1G51510/AT2G38730/AT5G40490/AT2G38770/AT3G49430/AT1G80070/AT2G47580/AT2G33340/AT2G33730/AT1G20920/AT2G18740/AT2G36130/AT4G01020/AT2G18510/AT5G61030/AT1G03140/AT3G12580/AT4G21660/AT5G42820/AT1G09760/AT1G20960/AT4G03120…	42
ath00908	Zeatin biosynthesis	5	32	0.950249	0.999911	0.861993	AT1G22360/AT1G22400/AT2G36780/AT2G36750/AT5G19040	5
ath00460	Cyanoamino acid metabolism	13	70	0.952028	0.999911	0.861993	AT3G47000/AT4G37930/AT5G20950/AT3G18080/AT5G04885/AT1G26560/AT2G44450/AT4G13930/AT4G32520/AT3G16150/AT4G29210/AT1G02850/AT5G54570	13
ath03050	Proteasome	11	61	0.953035	0.999911	0.861993	AT5G05780/AT2G05840/AT2G20140/AT3G05530/AT5G19990/AT1G20200/AT4G29040/AT5G58290/AT2G20580/AT2G27020/AT2G32730	11
ath00950	Isoquinoline alkaloid biosynthesis	3	22	0.954242	0.999911	0.861993	AT5G11520/AT2G20340/AT4G12290	3
ath00970	Aminoacyl-tRNA biosynthesis	23	115	0.955632	0.999911	0.861993	AT4G13780/AT1G25350/AT3G46100/AT4G39280/AT5G27470/AT5G26830/AT1G09620/AT4G26300/AT3G02760/AT1G50200/AT3G04600/AT2G04842/AT4G17300/AT4G31180/AT3G55400/AT2G31170/AT3G58140/AT3G13490/AT1G48520/AT1G66520/AT5G22800/AT5G56680/AT3G02660	23
ath03020	RNA polymerase	7	45	0.971455	0.999911	0.861993	AT4G35800/AT3G22320/AT3G52090/AT1G06790/AT1G60620/AT5G09920/AT5G60040	7
ath03022	Basal transcription factors	9	55	0.972437	0.999911	0.861993	AT1G02680/AT1G18040/AT4G24440/AT3G10330/AT5G27620/AT1G55300/AT1G75510/AT1G18340/AT1G07470	9
ath00966	Glucosinolate biosynthesis	3	26	0.981892	0.999911	0.861993	AT4G13430/AT3G49680/AT5G65780	3
ath04120	Ubiquitin mediated proteolysis	30	155	0.984336	0.999911	0.861993	AT3G17205/AT3G53090/AT3G61790/AT5G06460/AT3G17000/AT4G10180/AT5G22920/AT3G20060/AT1G21410/AT5G15400/AT1G78770/AT5G42990/AT5G18650/AT5G25560/AT5G59300/AT2G33340/AT5G13840/AT1G20140/AT4G02570/AT4G05050/AT5G41580/AT5G03240/AT5G05080/AT4G33270/AT4G38600/AT3G48150/AT5G50870/AT3G07370/AT5G46210/AT4G05320	30
ath00960	Tropane, piperidine and pyridine alkaloid biosynthesis	4	36	0.993153	0.999911	0.861993	AT5G06060/AT5G11520/AT4G12290/AT2G29150	4
ath00040	Pentose and glucuronate interconversions	18	107	0.993214	0.999911	0.861993	AT3G54920/AT5G61410/AT5G52560/AT5G51970/AT5G19730/AT4G13710/AT1G67750/AT3G55140/AT2G45220/AT3G14310/AT1G02810/AT3G29360/AT5G49650/AT3G29090/AT5G15490/AT3G53190/AT2G21370/AT5G57655	18
ath00190	Oxidative phosphorylation	28	163	0.99815	0.999911	0.861993	AT4G10040/AT5G40810/AT1G02410/AT5G47630/AT4G32530/AT5G66760/AT5G56090/AT5G08530/AT4G09650/AT5G62670/AT3G42050/AT4G32260/AT2G24520/AT5G47030/AT2G44620/AT3G28715/AT4G39080/AT2G20360/AT4G02580/AT5G40650/AT2G28520/AT3G52300/AT5G55290/AT3G47950/AT4G04640/AT4G38510/AT1G78900/AT5G09650	28
ath03010	Ribosome	67	364	0.999911	0.999911	0.861993	AT3G25920/AT5G28060/AT2G41840/AT1G72370/AT3G13580/AT3G54210/AT5G61170/AT4G23620/AT1G29070/AT2G33450/AT3G04400/AT3G63490/AT5G20180/AT3G44590/AT1G26910/AT3G49010/AT5G59850/AT2G19720/AT5G54600/AT5G15220/AT2G24090/AT1G07320/AT2G33800/AT4G36130/AT1G74050/AT5G40950/AT5G14320/AT4G01310/AT3G20230/AT1G08360/AT3G16780/AT3G26360/AT4G17560/AT5G27700/AT4G36420/AT5G13510/AT3G24830/AT3G27830/AT1G26740/AT1G75350…	67
